# Supplementary material for: Marked Differences in Butterfly Assemblage Composition between Forest Types in Central Amazonia, Brazil
Source: MDPI journal article supplement (doi:10.3390/f12070942), 2021-07-17
Supplement: s1 [file s1]

## SUPPLEMENTARY MATERIAL

Table S1. Butterfly species abundance in each forest type in Uauacú Lake region, lower Purus river, central Amazonia, Brazil. SM = Sampling method: n = net, t = trap; Strata: U= understory, C = canopy. t\* = butterfly that is not usually sampled through attractive trap.

| Butterfly species                   | Igapó    | Terra firme | Várzea   | SM | Strata | Total     |
|-------------------------------------|----------|-------------|----------|----|--------|-----------|
| <b>Hesperiidae</b>                  | <b>2</b> | <b>19</b>   | <b>5</b> |    |        | <b>26</b> |
| <b>Hesperiinae</b>                  |          | <b>3</b>    | <b>3</b> |    |        | <b>6</b>  |
| Hesperiini                          |          |             | 2        |    |        | 2         |
| <i>Cynea sp</i>                     |          |             | 1        | n  | U      | 1         |
| Hesperiini sp                       |          |             | 1        | n  | U      | 1         |
| Moncini                             |          | 3           | 1        |    |        | 4         |
| <i>Paracarystus menestries rona</i> |          | 1           |          | n  | U      | 1         |
| <i>Parphorus decora</i>             |          | 1           |          | n  | U      | 1         |
| <i>Saturnus reticulata</i>          |          | 1           |          | n  | U      | 1         |
| <i>Vehilius stictomenes</i>         |          |             | 1        | n  | U      | 1         |
| <b>Pyrginae</b>                     | <b>2</b> | <b>16</b>   | <b>2</b> |    |        | <b>20</b> |
| Eudamini                            | 2        | 14          | 1        |    |        | 17        |
| <i>Aguna sp</i>                     |          | 1           |          | n  | U      | 1         |
| <i>Entheus aureolus</i>             |          | 1           |          | n  | U      | 1         |
| <i>Entheus matho dius</i>           |          | 1           |          | n  | U      | 1         |
| <i>Hyalothyrus infernalis</i>       |          | 7           |          | n  | U      | 7         |
| <i>Hyalothyrus leucomelas</i>       | 1        | 1           |          | n  | U      | 2         |
| <i>Hyalothyrus neleus neleus</i>    |          |             | 1        | n  | U      | 1         |
| <i>Oileides azines</i>              |          | 1           |          | n  | U      | 1         |
| <i>Phanus marshallii</i>            |          | 1           |          | n  | U      | 1         |
| <i>Porphyrogenes pausias</i>        |          | 1           |          | n  | U      | 1         |
| <i>Salatis fulvius</i>              | 1        |             |          | n  | U      | 1         |
| Pyrgini                             |          | 2           | 1        |    | U      | 3         |
| <i>Pythoniades aff grandis</i>      |          |             | 1        | n  | U      | 1         |
| <i>Telemiades delalande</i>         |          | 2           |          | n  | U      | 2         |
| <b>Lycaenidae</b>                   | <b>3</b> | <b>11</b>   | <b>3</b> |    |        | <b>17</b> |
| <b>Theclinae</b>                    | <b>3</b> | <b>11</b>   | <b>3</b> |    |        | <b>17</b> |
| Eumaeini                            | 3        | 10          | 3        |    |        | 16        |
| <i>Calycopis cerata</i>             |          | 3           |          | n  | U      | 3         |
| <i>Calycopis sp1</i>                |          | 1           |          | n  | U      | 1         |
| <i>Calycopis sp2</i>                |          | 1           |          | n  | U      | 1         |
| <i>Caycopis bellera</i>             |          | 1           |          | n  | U      | 1         |
| <i>Celmia celmus</i>                | 2        | 1           | 1        | n  | U      | 4         |
| <i>Janthecla leea</i>               |          | 1           |          | n  | U      | 1         |

|                                         |            |            |            |     |     |            |
|-----------------------------------------|------------|------------|------------|-----|-----|------------|
| <i>Paiwarria venulius</i>               |            |            | 1          | n   | U   | 1          |
| <i>Panthiades aeolus</i>                |            | 1          |            | n   | U   | 1          |
| <i>Pseudolycaena marsyas</i>            |            |            | 1          | n   | U   | 1          |
| <i>Rekoa stagira</i>                    | 1          |            |            | n   | U   | 1          |
| <i>Theritas hemon</i>                   |            | 1          |            | n   | U   | 1          |
| Theclini                                |            | 1          |            |     |     | 1          |
| <i>Camissecla aff vesper</i>            |            | 1          |            | n   | U   | 1          |
| <b>Nymphalidae</b>                      | <b>106</b> | <b>193</b> | <b>227</b> |     |     | <b>526</b> |
| <b>Biblidinae</b>                       | <b>27</b>  | <b>16</b>  | <b>17</b>  |     |     | <b>60</b>  |
| Ageroniini                              | 6          | 1          | 6          |     |     | 13         |
| <i>Ectima iona</i>                      | 1          |            | 1          | n   | U   | 2          |
| <i>Ectima thecla</i>                    | 1          |            |            | n   | U   | 1          |
| <i>Hamadryas arinome</i>                | 3          | 1          | 2          | t   | U,C | 6          |
| <i>Hamadryas feronia</i>                | 1          |            | 1          | t   | U   | 2          |
| <i>Hamadryas laodamia</i>               |            |            | 2          | t   | U   | 2          |
| Epicaliini                              | 18         | 13         | 3          |     |     | 34         |
| <i>Catonephele acontius</i>             | 7          | 5          | 1          | t   | U,C | 13         |
| <i>Catonephele antinoe</i>              | 8          |            | 2          | n,t | U,C | 10         |
| <i>Catonephele numilia</i>              |            | 3          |            | t   | U,C | 3          |
| <i>Eunica alpais alpais</i>             | 1          |            |            | n   | U   | 1          |
| <i>Eunica concordia</i>                 | 1          |            |            | n   | U   | 1          |
| <i>Nessaea obrinus</i>                  | 1          | 5          |            | n,t | U   | 6          |
| Epiphilini                              | 1          | 1          | 8          |     |     | 10         |
| <i>Pyrrhogyra crameri nautaca</i>       |            |            | 4          | n   | U   | 4          |
| <i>Temenis laothoe</i>                  | 1          | 1          | 4          | t   | C   | 6          |
| Eunicini                                | 2          | 1          |            |     |     | 3          |
| <i>Eunica eurota</i>                    |            | 1          |            | t   | C   | 1          |
| <i>Eunica orphise</i>                   | 2          |            |            | t   | C   | 2          |
| <b>Charaxinae</b>                       | <b>16</b>  | <b>9</b>   | <b>1</b>   |     |     | <b>26</b>  |
| Anaeini                                 | 5          | 8          | 1          |     |     | 14         |
| <i>Memphis leonida</i>                  |            | 4          |            | t   | U,C | 4          |
| <i>Memphis moruus moruus</i>            | 1          |            | 1          | t   | C   | 2          |
| <i>Memphis phantes vicina</i>           | 1          | 1          |            | t   | U,C | 2          |
| <i>Memphis polycarmes</i>               | 1          |            |            | t   | U   | 1          |
| <i>Siderone galanthis galanthis</i>     | 1          |            |            | t   | C   | 1          |
| <i>Zaretis isidora</i>                  | 1          | 2          |            | t   | U,C | 3          |
| <i>Zaretis itys</i>                     |            | 1          |            | t   | U   | 1          |
| Preponini                               | 11         | 1          |            |     |     | 12         |
| <i>Archaeoprepona demophon demophon</i> | 6          |            |            | t   | U   | 6          |
| <i>Archaeoprepona demophoon</i>         | 1          |            |            | t   | U   | 1          |
| <i>Prepona dexamenus</i>                | 2          |            |            | t   | C   | 2          |
| <i>Prepona laertes demodice</i>         | 2          | 1          |            | t   | U,C | 3          |
| <b>Cyrestinae</b>                       | <b>1</b>   | <b>1</b>   | <b>1</b>   |     |     | <b>3</b>   |
| Cyrestini                               | 1          | 1          | 1          |     |     | 3          |
| <i>Marpesia crethon</i>                 | 1          | 1          |            | n   | U   | 2          |
| <i>Marpesia egina</i>                   |            |            | 1          | n   | U   | 1          |

|                                         |           |            |            |     |            |
|-----------------------------------------|-----------|------------|------------|-----|------------|
| <b>Danainae</b>                         | <b>5</b>  | <b>5</b>   |            |     | <b>10</b>  |
| Danaini                                 | 1         |            |            |     | 1          |
| <i>Hypothyris aff daphnis</i>           | 1         |            | n          | U   | 1          |
| Ithomiini                               | 4         | 5          |            |     | 9          |
| <i>Forbestria olivencia truncata</i>    |           | 1          | n          | U   | 1          |
| <i>Hyposcada illinissa illinissa</i>    | 1         |            | n          | U   | 1          |
| <i>Hypothyris fluonia fluonia</i>       |           | 1          | n          | U   | 1          |
| <i>Mechanitis mazaesus egaensis</i>     |           | 1          | n          | U   | 1          |
| <i>Mechanitis polymnia apicenotata</i>  |           | 1          | n          | U   | 1          |
| <i>Melinaea ludovica ludovica</i>       | 2         |            | n          | U   | 2          |
| <i>Melinaea mneme mauensis</i>          | 1         |            | n          | U   | 1          |
| <i>Tithorea harmonia egaensis</i>       |           | 1          | n          | U   | 1          |
| <b>Heliconiinae</b>                     | <b>14</b> | <b>3</b>   | <b>10</b>  |     | <b>27</b>  |
| Heliconiini                             | 14        | 3          | 10         |     | 27         |
| <i>Dryas iulia</i>                      |           | 1          | n          | U   | 1          |
| <i>Heliconius aeode</i>                 |           | 1          | n          | U   | 1          |
| <i>Heliconius antiochus</i>             | 10        |            | 2          | n   | 12         |
| <i>Heliconius erato lavitta</i>         |           | 1          | n          | U   | 1          |
| <i>Heliconius numata silvana</i>        |           | 1          | n          | U   | 1          |
| <i>Heliconius pardalinus pardalinus</i> |           |            | 5          | n   | 5          |
| <i>Heliconius sara</i>                  | 4         |            | 1          | n   | 5          |
| <i>Heliconius wallacei</i>              |           |            | 1          | n   | 1          |
| <b>Limenitidinae</b>                    | <b>1</b>  |            |            |     | <b>1</b>   |
| Limenitidini                            | 1         |            |            |     | 1          |
| <i>Adelpha nea nea</i>                  | 1         |            | n          | U   | 1          |
| <b>Nymphalinae</b>                      | <b>8</b>  | <b>5</b>   | <b>2</b>   |     | <b>15</b>  |
| Coeini                                  | 8         | 5          | 2          |     | 15         |
| <i>Baeotus aeilus</i>                   | 1         |            | t          | U   | 1          |
| <i>Colobura dirce</i>                   | 2         |            | t          | U   | 2          |
| <i>Historis acheronta</i>               | 3         | 1          | t          | C   | 4          |
| <i>Historis odius</i>                   | 2         | 1          | 2          | n,t | 5          |
| <i>Tigridia acesta</i>                  |           | 3          | n          | U   | 3          |
| <b>Satyrinae</b>                        | <b>39</b> | <b>154</b> | <b>191</b> |     | <b>384</b> |
| Brassolini                              | 5         | 24         | 1          |     | 30         |
| <i>Bia actorion</i>                     |           | 19         | n,t        | U   | 19         |
| <i>Catoblepia berecynthia</i>           |           | 3          | n,t        | U   | 3          |
| <i>Catoblepia soranus</i>               | 1         | 2          | n,t        | U   | 3          |
| <i>Catoblepia xanthicles</i>            | 1         |            | t          | U   | 1          |
| <i>Opsiphanes invirae</i>               | 3         |            | t          | U,C | 3          |
| <i>Opsiphanes quiteria quiteria</i>     |           |            | 1          | t   | 1          |
| Haeterini                               | 58        |            |            |     | 58         |
| <i>Cithaerias aurora</i>                | 9         |            | n,t        | U   | 9          |
| <i>Cithaerias pireta</i>                | 1         |            | n          | U   | 1          |
| <i>Haetera piera</i>                    | 5         |            | n          | U   | 5          |
| <i>Pierella astyoche bernhardina</i>    | 2         |            | n          | U   | 2          |
| <i>Pierella chalybaea</i>               | 18        |            | n          | U   | 18         |

|                                         |          |    |          |     |     |          |
|-----------------------------------------|----------|----|----------|-----|-----|----------|
| <i>Pierella hortona hortona</i>         |          | 2  |          | n   | U   | 2        |
| <i>Pierella lena brasiliensis</i>       |          | 21 |          | n   | U   | 21       |
| Morphini                                | 3        | 4  | 4        |     |     | 11       |
| <i>Antirrhea taygetina</i>              |          |    | 2        | n   | U   | 2        |
| <i>Caerois chorinaeus protone</i>       |          | 1  |          | n   | U   | 1        |
| <i>Morpho achilles</i>                  | 2        | 1  | 2        | n,t | U   | 5        |
| <i>Morpho helenor</i>                   |          | 2  |          | n   | U   | 2        |
| <i>Morpho menelaus terrestris</i>       | 1        |    |          | n   | U   | 1        |
| Satyrini                                | 31       | 68 | 186      |     |     | 285      |
| <i>Amiga arnaca arnaca</i>              |          | 5  |          | n,t | U   | 5        |
| <i>Amphidecta calliomma</i>             |          |    | 4        | t   | U   | 4        |
| <i>Amphidecta pignerator pignerator</i> |          |    | 2        | n,t | U   | 2        |
| <i>Caeruleptychia sp</i>                |          |    | 1        | t   | C   | 1        |
| <i>Chloreuptychia chlorimene</i>        | 12       | 3  | 3        | n,t | U   | 18       |
| <i>Chloreuptychia herseis</i>           | 4        | 10 | 20       | n,t | U   | 34       |
| <i>Chloreuptychia tolumnia</i>          | 1        |    | 6        | n,t | U   | 7        |
| <i>Cissia myncea</i>                    |          |    | 8        | t   | U,C | 8        |
| <i>Erichthodes antonina</i>             | 2        |    | 2        | t   | U   | 4        |
| <i>Euptychia mollina</i>                |          | 5  |          | n   | U   | 5        |
| <i>Hermeuptychia hermes</i>             | 1        |    | 9        | n   | U   | 10       |
| <i>Hermeuptychia maimoune</i>           |          |    | 3        | n,t | U,C | 3        |
| <i>Hermeuptychia undulata</i>           | 6        |    |          | n   | U   | 6        |
| <i>Magneuptychia aff ocnus</i>          |          |    | 11       | n,t | U,C | 11       |
| <i>Magneuptychia analis</i>             |          | 3  |          | n   | U   | 3        |
| <i>Magneuptychia fugitiva</i>           |          | 5  |          | t   | U   | 5        |
| <i>Magneuptychia harpyia batesii</i>    |          | 1  |          | n   | U   | 1        |
| <i>Magneuptychia ocnus</i>              |          |    | 15       | n,t | U,C | 15       |
| <i>Magneuptychia tricolor tricolor</i>  |          | 3  |          | n   | U   | 3        |
| <i>Nubila nortia</i>                    |          | 20 |          | n   | U   | 20       |
| <i>Pareuptychia binocula</i>            |          |    | 1        | n   | U   | 1        |
| <i>Pareuptychia summandosa</i>          |          |    | 2        | t   | U   | 2        |
| <i>Posttaygetis penelea</i>             |          |    | 3        | t   | U   | 3        |
| <i>Pseudodebis marpessa</i>             |          |    | 22       | n,t | U   | 22       |
| <i>Pseudodebis valentina</i>            | 5        |    | 17       | n,t | U,C | 22       |
| <i>Scriptor sphenophorus</i>            |          | 6  |          | n   | U   | 6        |
| <i>Taygetis cleopatra</i>               |          | 1  | 1        | n,t | U   | 2        |
| <i>Taygetis laches</i>                  |          | 4  |          | n,t | U   | 4        |
| <i>Taygetis mermeria</i>                |          |    | 42       | n,t | U   | 42       |
| <i>Taygetis rufomarginata</i>           |          |    | 9        | n,t | U   | 9        |
| <i>Taygetis thamyra</i>                 |          | 1  |          | t   | U   | 1        |
| <i>Taygetis virgilia</i>                |          |    | 5        | t   | U,C | 5        |
| <i>Vanima lesbia</i>                    |          | 1  |          | n   | U   | 1        |
| <b>Papilionidae</b>                     | <b>1</b> |    | <b>5</b> |     |     | <b>6</b> |
| <b>Papilioninae</b>                     | <b>1</b> |    | <b>5</b> |     |     | <b>6</b> |
| Leptocircini                            | 1        |    | 1        |     |     | 2        |
| <i>Neographium agesilaus autosilaus</i> |          |    | 1        | n   | U   | 1        |

|                                     |           |           |           |   |   |            |
|-------------------------------------|-----------|-----------|-----------|---|---|------------|
| <i>Protesilaus telesilaus</i>       | 1         |           |           | n | U | 1          |
| Papilionini                         |           |           | 1         |   |   | 1          |
| <i>Heraclides hyppason</i>          |           |           | 1         | n | U | 1          |
| Troidini                            |           |           | 3         |   |   | 3          |
| <i>Parides anchises</i>             |           |           | 2         | n | U | 2          |
| <i>Parides vertumnus astorius</i>   |           |           | 1         | n | U | 1          |
| <b>Pieridae</b>                     | <b>4</b>  | <b>1</b>  | <b>5</b>  |   |   | <b>10</b>  |
| <b>Coliadinae</b>                   | <b>3</b>  | <b>1</b>  | <b>5</b>  |   |   | <b>9</b>   |
| Coliadini                           | 3         | 1         |           |   |   | 4          |
| <i>Phoebis argante</i>              | 2         |           |           | n | U | 2          |
| <i>Phoebis philea</i>               |           | 1         |           | n | U | 1          |
| <i>Phoebis statira</i>              | 1         |           |           | n | U | 1          |
| Euremini                            |           |           | 5         |   |   | 5          |
| <i>Eurema albula</i>                |           |           | 5         | n | U | 5          |
| <b>Pierinae</b>                     | <b>1</b>  |           |           |   |   | <b>1</b>   |
| Pierini                             | 1         |           |           |   |   | 1          |
| <i>Glutophrissa drusilla tenuis</i> | 1         |           |           | n | U | 1          |
| <b>Riodinidae</b>                   | <b>26</b> | <b>63</b> | <b>52</b> |   |   | <b>141</b> |
| <b>Euselasiinae</b>                 | <b>6</b>  | <b>14</b> | <b>2</b>  |   |   | <b>22</b>  |
| Euselasiini                         | 6         | 14        | 2         |   |   | 22         |
| <i>Euselasia calligramma</i>        | 2         |           |           | n | U | 2          |
| <i>Euselasia charilis</i>           |           | 1         |           | n | U | 1          |
| <i>Euselasia euriteus</i>           |           | 5         |           | n | U | 5          |
| <i>Euselasia eutyclus</i>           | 3         | 1         | 2         | n | U | 6          |
| <i>Euselasia hygenius</i>           |           | 1         |           | n | U | 1          |
| <i>Euselasia melaphaea</i>          |           | 5         |           | n | U | 5          |
| <i>Euselasia orba orba</i>          | 1         |           |           | n | U | 1          |
| <i>Euselasia orba spectralis</i>    |           | 1         |           | n | U | 1          |
| <b>Riodininae</b>                   | <b>20</b> | <b>49</b> | <b>50</b> |   |   | <b>119</b> |
| Eurybiini                           |           | 11        |           |   |   | 11         |
| <i>Alesa hemiurga</i>               |           | 1         |           | n | U | 1          |
| <i>Eurybia nicaeus erythinos</i>    |           | 6         |           | n | U | 6          |
| <i>Eurybia nicaeus nicaeus</i>      |           | 4         |           | n | U | 4          |
| Helicopini                          | 1         |           | 6         |   |   | 7          |
| <i>Anteros formosus</i>             |           |           | 1         | n | U | 1          |
| <i>Emesis cerea</i>                 | 1         |           | 1         | n | U | 2          |
| <i>Helicopsis cupido incerta</i>    |           |           | 1         | n | U | 1          |
| <i>Helicopsis gnidus interrupta</i> |           |           | 3         | n | U | 3          |
| Mesosemiini                         | 3         | 8         | 1         |   |   | 12         |
| <i>Eunogyra satyrus</i>             |           | 1         |           | n | U | 1          |
| <i>Hyphilaria parthenis</i>         |           | 2         | 1         | n | U | 3          |
| <i>Leucochimona icare</i>           |           | 1         |           | n | U | 1          |
| <i>Mesosemia issia</i>              |           | 2         |           | n | U | 2          |
| <i>Mesosemia melaene melaene</i>    |           | 1         |           | n | U | 1          |
| <i>Mesosemia nyctea nyctea</i>      | 2         |           |           | n | U | 2          |
| <i>Mesosemia spl</i>                | 1         |           |           | n | U | 1          |

|                                         |            |            |            |    |   |            |
|-----------------------------------------|------------|------------|------------|----|---|------------|
| <i>Mesosemia sp2</i>                    |            | 1          |            | n  | U | 1          |
| Nymphidiini                             | 9          | 16         | 18         |    |   | 43         |
| <i>Adelotypa epixanthe</i>              |            | 1          |            | n  | U | 1          |
| <i>Adelotypa hubneri</i>                |            | 4          |            | n  | U | 4          |
| <i>Adelotypa panthea auseris</i>        | 2          | 2          |            | n  | U | 4          |
| <i>Calospila lucianus lucianus</i>      |            |            | 2          | n  | U | 2          |
| <i>Juditha caucana</i>                  | 2          |            | 1          | n  | U | 3          |
| <i>Lemonias egaensis</i>                | 1          |            |            | n  | U | 1          |
| <i>Nymphidium ascolia</i>               |            | 2          | 12         | n  | U | 14         |
| <i>Nymphidium azanoides amazonensis</i> | 1          | 1          |            | n  | U | 2          |
| <i>Nymphidium baeotia</i>               | 1          | 5          |            | n  | U | 6          |
| <i>Nymphidium caricae parthenium</i>    | 1          |            |            | n  | U | 1          |
| <i>Nymphidium mantus</i>                | 1          |            |            | n  | U | 1          |
| <i>Nymphidium ninias</i>                |            | 1          |            | n  | U | 1          |
| <i>Setabis myrtis myrtis</i>            |            |            | 1          | n  | U | 1          |
| <i>Synargis calyce</i>                  |            |            | 1          | n  | U | 1          |
| <i>Synargis pitteus</i>                 |            |            | 1          | n  | U | 1          |
| Riodinini                               | 1          | 6          | 3          |    |   | 10         |
| <i>Amarynthia meneria</i>               |            |            | 1          | n  | U | 1          |
| <i>Ancyluris aulestes</i>               |            | 1          |            | t* | U | 1          |
| <i>Ancyluris moliboeus eudaemon</i>     |            | 1          |            | n  | U | 1          |
| <i>Cartea vitula trailii</i>            | 1          |            |            | n  | U | 1          |
| <i>Detritivora sp</i>                   |            | 1          |            | n  | U | 1          |
| <i>Exoplisia cadmeis</i>                |            | 1          |            | n  | U | 1          |
| <i>Metacharis lucius</i>                |            |            | 1          | n  | U | 1          |
| <i>Riodina lysippus lysias</i>          |            | 1          | 1          | n  | U | 2          |
| <i>Themone pais sublimata</i>           |            | 1          |            | t* | U | 1          |
| Stalachtini                             | 5          | 8          | 22         |    |   | 35         |
| <i>Stalachtis calliope</i>              | 1          | 1          |            | n  | U | 2          |
| <i>Stalachtis euterpe latefasciata</i>  | 4          | 7          | 22         | n  | U | 33         |
| Symmachiini                             | 1          |            |            |    |   | 1          |
| <i>Phaenochitonia cingulus</i>          | 1          |            |            | n  | U | 1          |
| <b>Total</b>                            | <b>142</b> | <b>287</b> | <b>297</b> |    |   | <b>726</b> |
